# Supplementary material
Source: Springer Nature journal article supplement (https://www.springermedizin.de/resource/supplementary/13049_2012_543_MOESM2_ESM.pdf/9666884)
Supplement: MOESM2 [file 9666884]

# LUCAS™ CPR

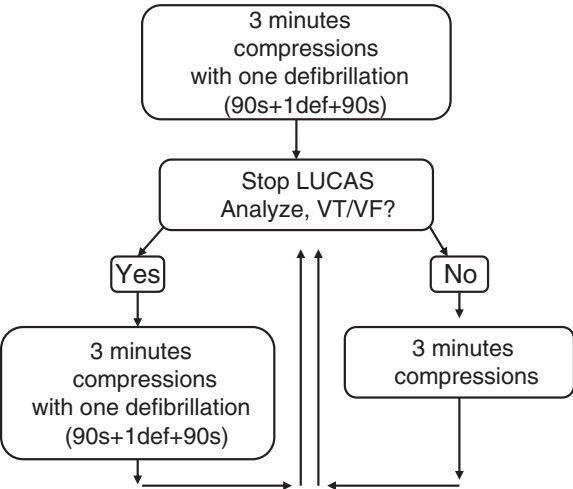

## Medications

*Patients with VT/VF*

Adrenalin 1 mg i.v. or i.o.

After 3 defibrillations.

There after every 3rd minute.

(Alternatively 3 mg in the ET tube)

Amidarone 300 mg after

4 defibrillations, 150 mg

after 7 defibrillations

*Patients with asystoli / PEA*

Adrenalin 1 mg i.v. or i.o.

as soon as possible, there after

every 3rd minute.

(Alternatively 3mg in the ET tube)

Cardiac arrest witnessed by the ambulance crew, should if VT/VF be defibrillated x 1 as quick as possible.

*See separate algorithm!*
